# Supplementary material
Source: PubMed Central journal article supplement (PMC3459482)
Supplement: 12_173_Laragione.Suppl.pdf [file 12_173_Laragione.Suppl.pdf]

Supplemental Data

# Liver X Receptor Regulates Rheumatoid Arthritis Fibroblast-like Synoviocyte Invasiveness, Matrix Metalloproteinase 2 Activation, Interleukin-6 and CXCL10

Teresina Laragione<sup>1</sup> and Pércio S Gulko<sup>1,2</sup>

Online address: <http://www.molmed.org>

The Feinstein Institute for Medical Research 

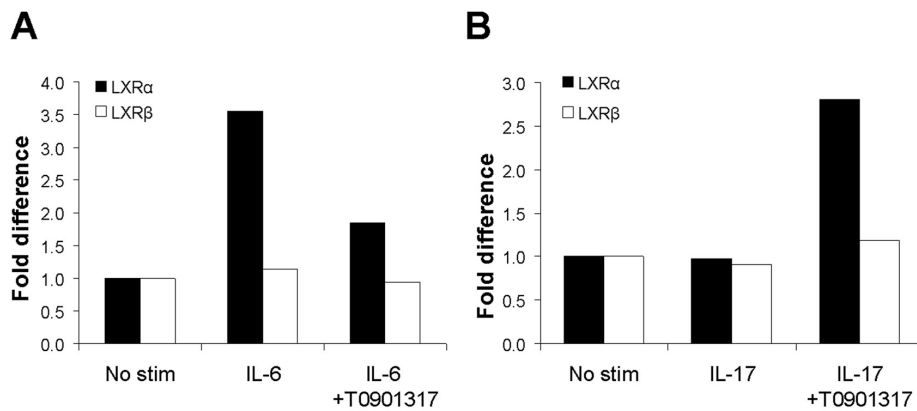

**Supplementary Figure S1.** Treatment with IL-6 or IL-17 does not reduce levels of LXR in RA FLS. FLS obtained from five different RA patients were treated with IL-6 (100 ng/mL) or IL 17 (10 ng/ml) for 6 h. qPCR analyses revealed that IL-6 increased the expression of LXR $\alpha$  by 3.5-fold. IL-17 did not affect on LXR $\alpha$ . Both IL-6 and IL-17-treated FLS remained responsive to T0901317, which increased LXR $\alpha$  expression by 1.8-fold and 2.8-fold respectively.
